# Supplementary material
Source: publisher figshare collection journal article supplement (https://acs.figshare.com/ndownloader/files/21053802)
Supplement: Supplementary file 1 [file 21053802]

# Near-decadal oscillation of water levels and mercury bioaccumulation in the Laurentian Great Lakes region

C.J. Watras<sup>1,2\*</sup>, H-Y Teng<sup>3</sup>, A.W. Latzka<sup>4</sup>, M.W. Meyer<sup>5</sup> and Z. Zhang<sup>3</sup>

1. Bureau of Water Quality, Wisconsin Department of Natural Resources, Madison, WI, USA 53701

2. Center for Limnology, University of Wisconsin-Madison, Trout Lake Research Station, Boulder Junction WI, USA 54512

3. Department of Statistics, University of Wisconsin-Madison, Madison, WI, USA 53706

4. Bureau of Fisheries, Wisconsin Department of Natural Resources, Madison, WI, USA 53701

5. Nova Ecological Services, Manitowish Waters, WI USA 54557

\*Corresponding author: Carl Watras (cjwatras@wisc.edu)

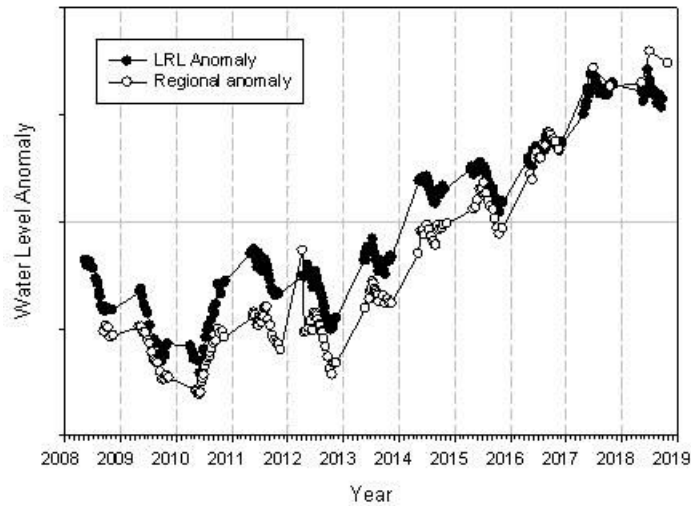

Figure S2. Coherence between the regional WL anomaly and the WL anomaly for Little Rock Lake (LRL). Note that the available data for LRL only spans the recent decade, but the similarity suggests that the regional time series is a reasonable proxy for LRL over longer periods of time.
